# Supplementary material
Source: PubMed Central journal article supplement (PMC6318062)
Supplement: NIHMS1510419-supplement-1.pdf [file NIHMS1510419-supplement-1.pdf]

# Supplementary Fig.S1

## Fig. 1A WB quantification

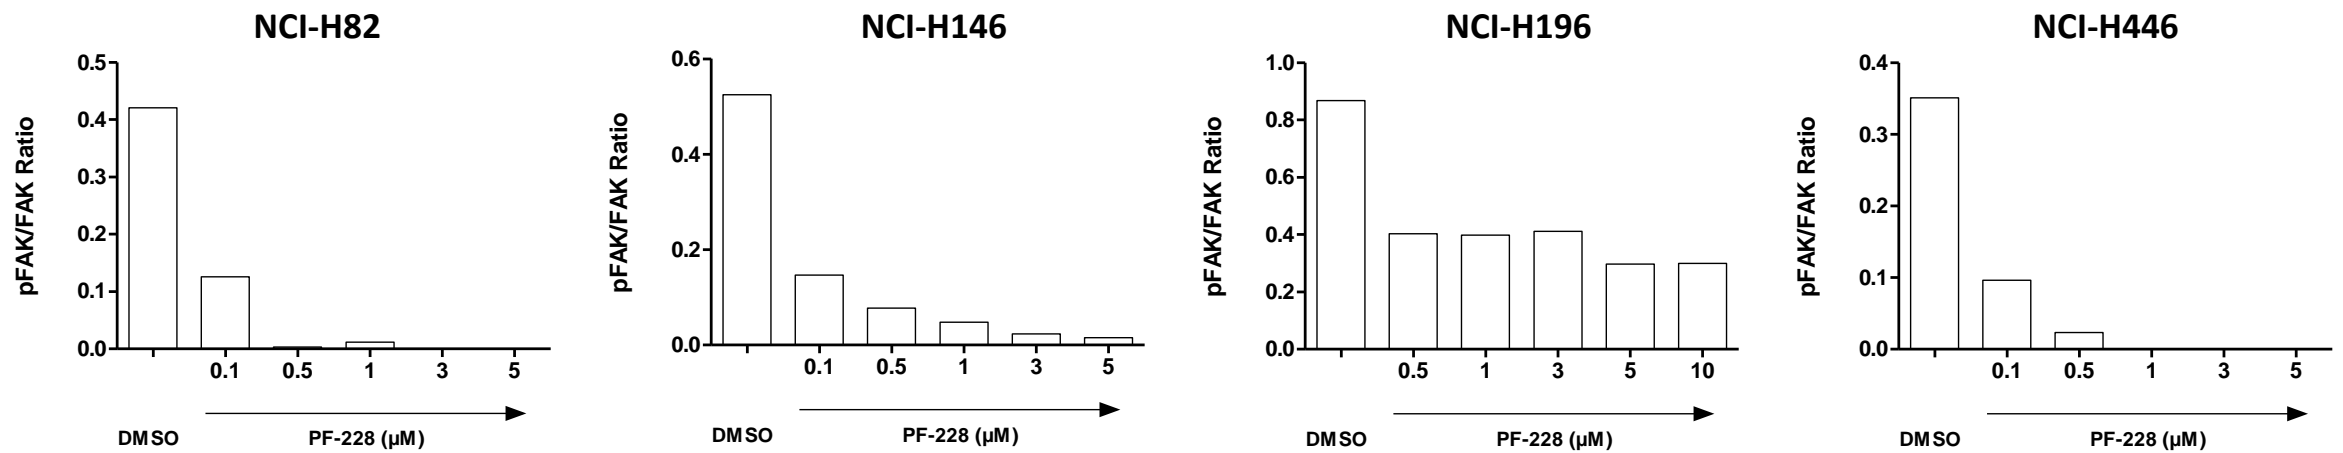

## Fig. 2A WB quantification

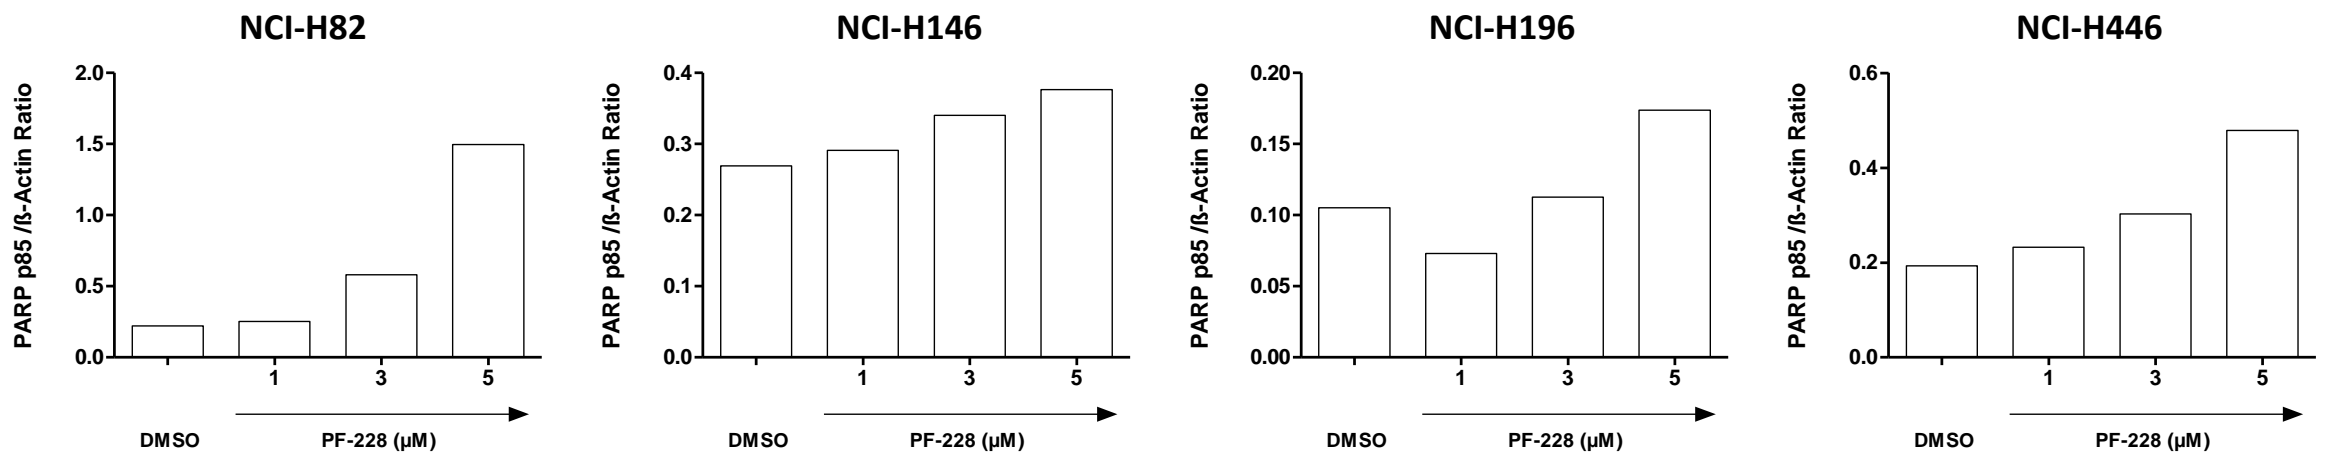

# Supplementary Fig.S1

## Fig. 4A WB quantification

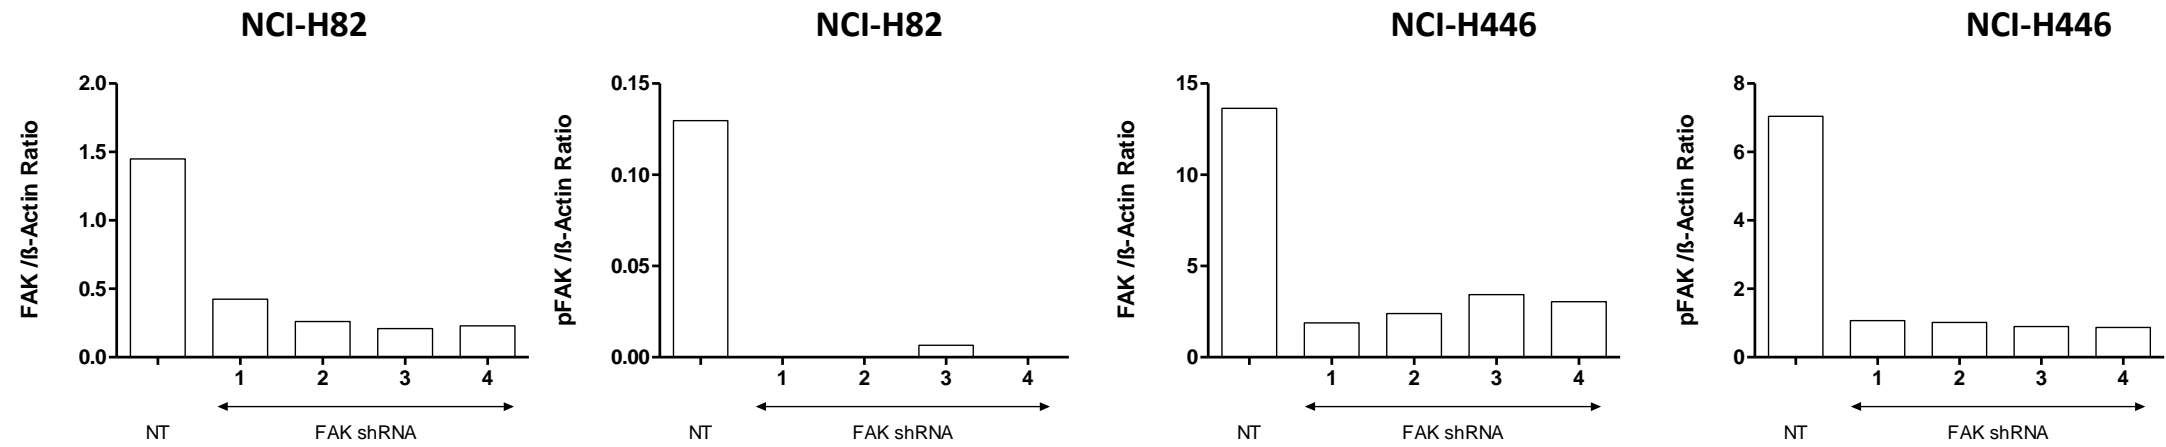

## Fig. 4B WB quantification

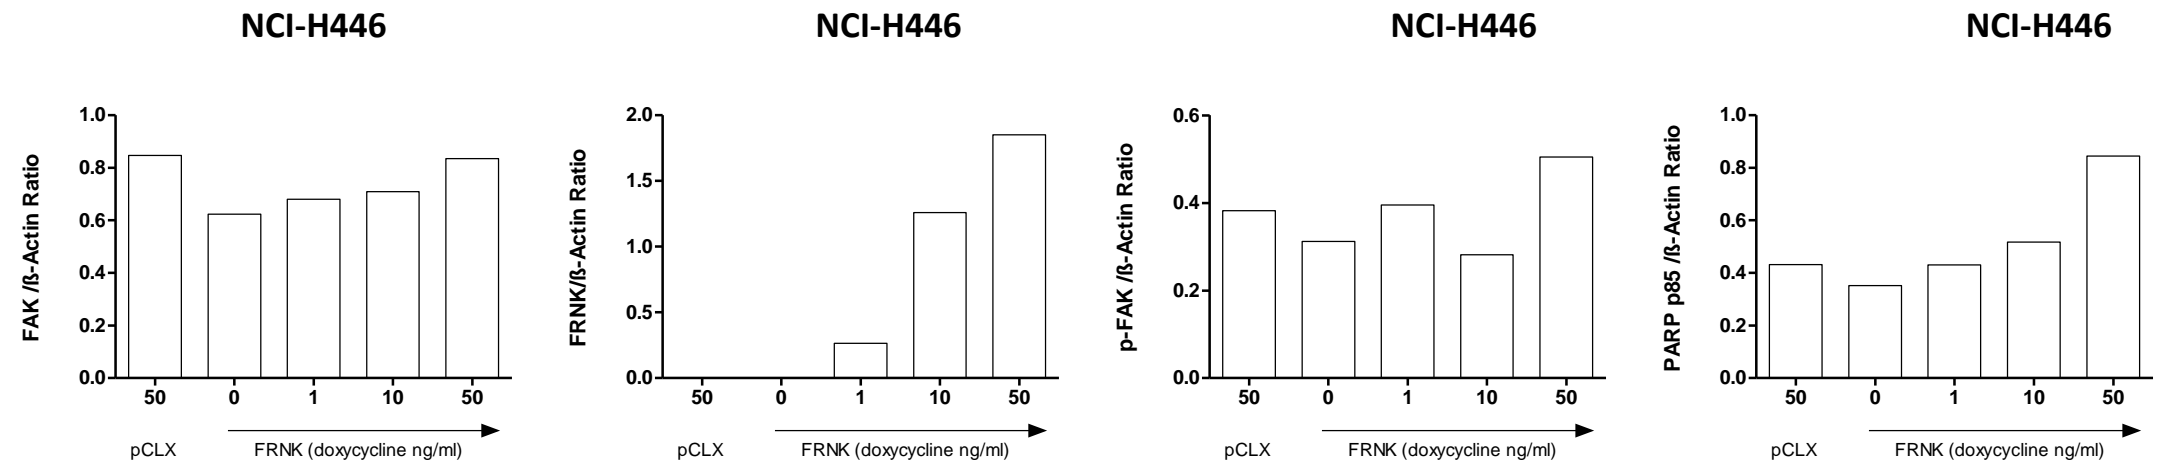

# Supplementary Fig.S1

Fig. 5A WB quantification

NCI-H446

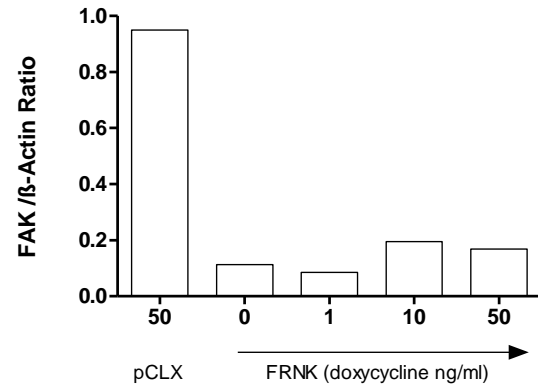

NCI-H446

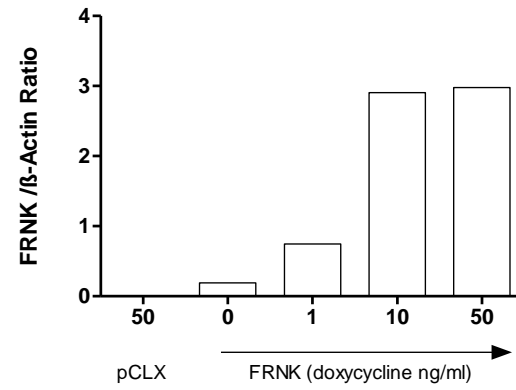

NCI-H446

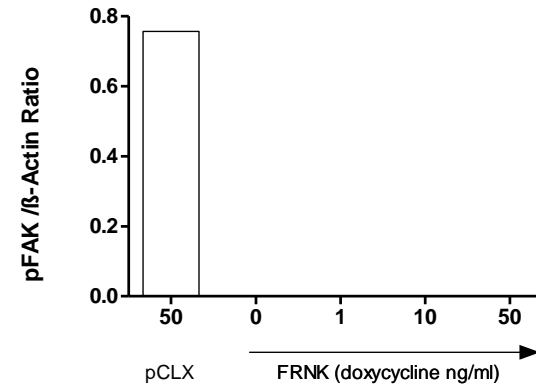

NCI-H446

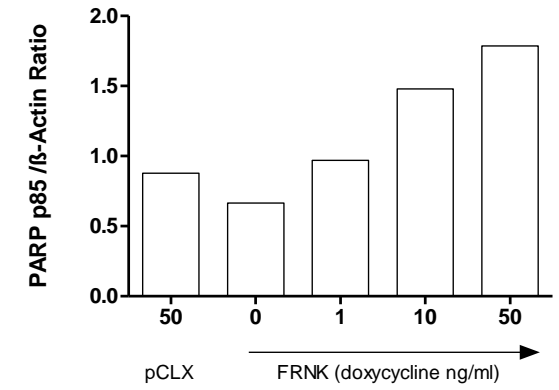

**Supplementary Figure S1: Western blot (WB) densitometric quantifications:** Densitometric quantification of the WB displayed in Figures 1A, 2A, 4A, 4B, and 5A was performed using the Quantity One analysis software (Bio-Rad). The Y-axis represents the level of protein of interest normalized to  $\beta$ -Actin. The X-axis represents experimental conditions. These graphs confirm the conclusions drawn in the manuscript based on the WB pictures.

NCI-H446

A

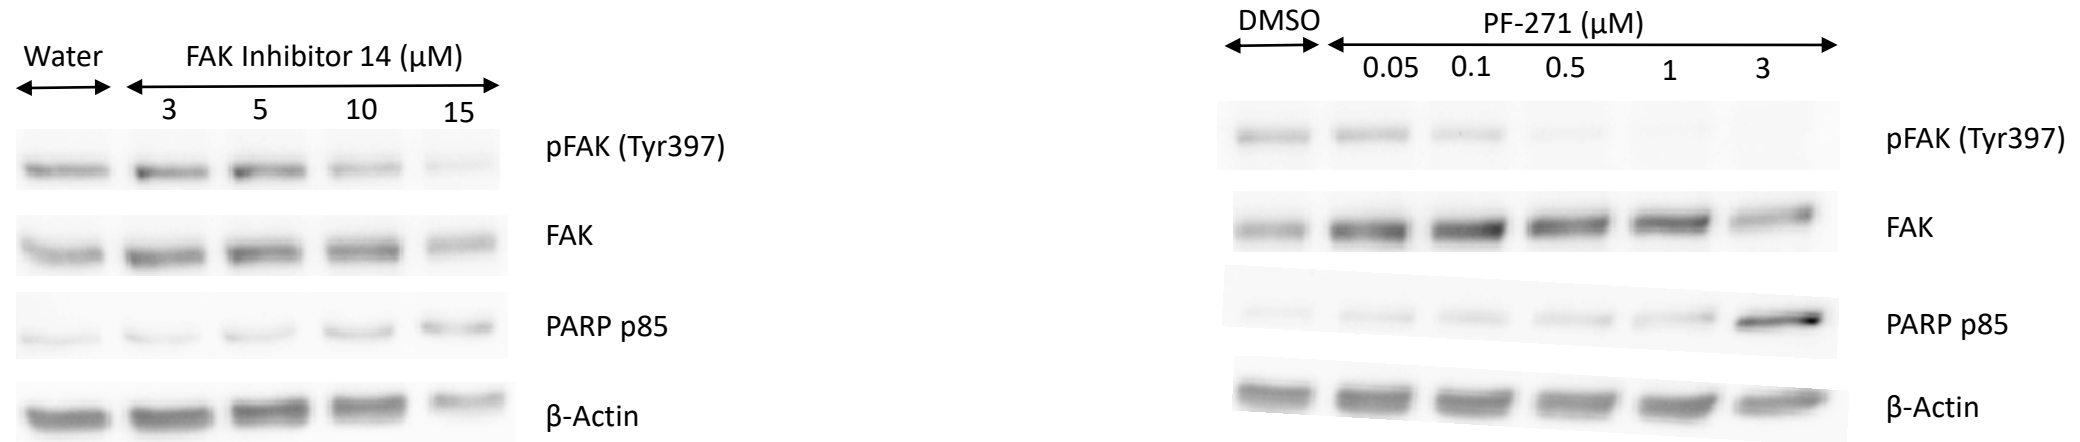

B

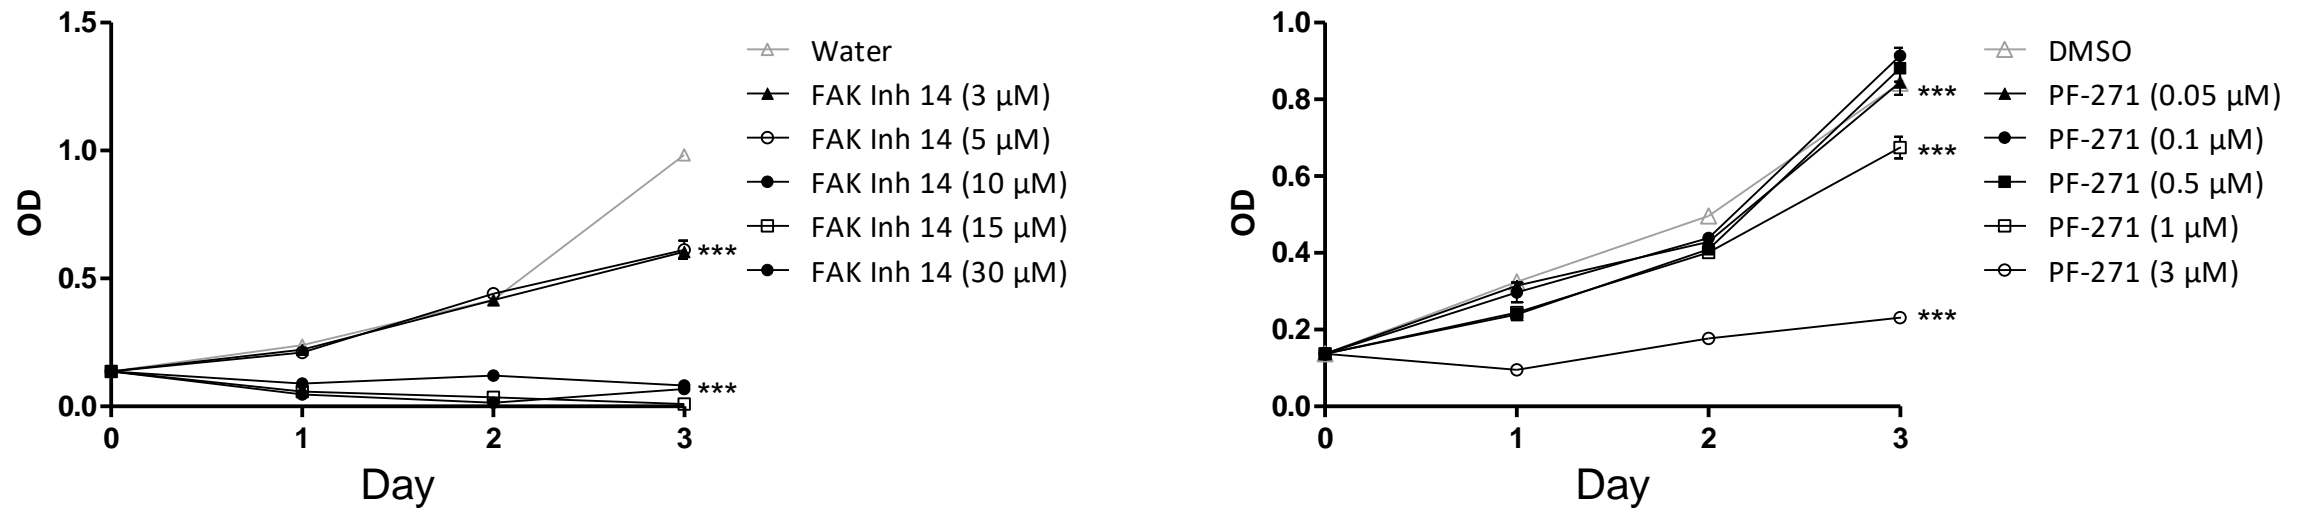

**Supplementary Figure S2: FAK Inhibitor 14 (Inh14) and PF-562,271 (PF-271)'s effects on FAK expression/activity, cell proliferation, and apoptosis in NCI-H446 SCLC cell lines:**

**A. FAK expression and phosphorylation and PARP p85 expression evaluation by Western blot (WB).** Whole cell lysates from NCI-H446 SCLC cell lines treated with Inh14, PF-271, or control for 60 min. (except 48h for evaluation of apoptosis via PARP p85 expression) were resolved by sodium dodecylsulfate-polyacrylamide gel electrophoresis (SDS-PAGE) and blots were incubated with antibodies against total FAK (125 kD), phospho-FAK (Tyr397) (125 kD), PARP p85 (85 kD), and  $\beta$ -Actin (45 kD) for normalization. Dose-dependent inhibition of FAK phosphorylation (Tyr397) and dose-dependent increase of PARP p85 expression, marker of apoptosis, was observed by WB in cell lines treated with Inh 14 or PF-271 as compared to those treated with control, while total FAK expression was not modified.

**B. Cell proliferation evaluation by WST-1 assay.** NCI-H446 SCLC cell lines were cultured for three days in presence of Inh14, PF-271, or control. Dose-dependent inhibition of proliferation was observed by WST-1 assay in cells treated with Inh14 or PF-271 as compared to those treated with control. Optical density (OD) in Y-axis reflects the proportion of metabolically active cells. Error bars represent mean +/- standard deviation (SD) (n=3). All the graphs represent one of three independent experiments with similar results. \*\*\*  $P \leq 0.001$ .





## Supplementary Figure S3: PF-573,228 (PF-228)'s effects on FAK expression/activity, cell proliferation, and apoptosis in

### NCI-H82 SCLC cell lines transduced with FAK shRNA:

NCI-H82 SCLC cell lines were stably transduced with FAK shRNA or no-target (NT) shRNA as control, and submitted to puromycin selection for two weeks.

**A. FAK expression/activation and PARP p85 expression evaluation by Western blot (WB).** Whole cell lysates from NCI-H82 SCLC cell lines transduced with FAK or NT shRNA and treated with PF-228 or DMSO control for 90 min. (except 48h for evaluation of apoptosis via PARP p85 expression) were resolved by sodium dodecylsulfate-polyacrylamide gel electrophoresis (SDS-PAGE) and blots were incubated with antibodies against total FAK (125 kD), phospho-FAK (Tyr397) (125 kD), PARP p85 (85 kD), and  $\beta$ -Actin (45 kD) for normalization. Total FAK expression decreased in cell lines transduced with FAK shRNA but not in those transduced with NT shRNA, as compared to wild-type (WT) cell lines, independently of PF-228 treatment. Phospho-FAK expression was absent in cell lines transduced with FAK shRNA and those treated with PF-228, while it was expressed in cell lines transduced with NT shRNA and not treated with PF-228. PARP p85 expression, marker of apoptosis, significantly increased in cell

lines transduced with NT shRNA and treated with PF-228 but not in those transduced with FAK shRNA and treated with PF-228.

**B. WB densitometric quantification of PARP p85 expression.** Densitometric quantification of PARP p85 expression on the WB displayed in Supplementary Fig.S3A was performed using the Quantity One analysis software (Bio-Rad). The Y-axis represents the level of each protein of interest normalized to  $\beta$ -Actin. The X-axis represents experimental conditions This graph confirms the observations described in Fig.S3A.

**C. Cell proliferation evaluation by WST-1 assay.** NCI-H82 SCLC cell lines transduced with FAK or NT shRNA were cultured for three days in presence of PF-228 or DMSO control. A significantly less important inhibition of proliferation was observed after PF-228 treatment in cell lines transduced with FAK shrRNA as compared with those transduced with NT shRNA. Optical density (OD) in Y-axis reflects the proportion of metabolically active cells. Error bars represent mean +/- standard deviation (SD) (n=3).

All the graphs represent one of three independent experiments with similar results. \*\*\*  $P \leq 0.001$ .

NCI-H446

A

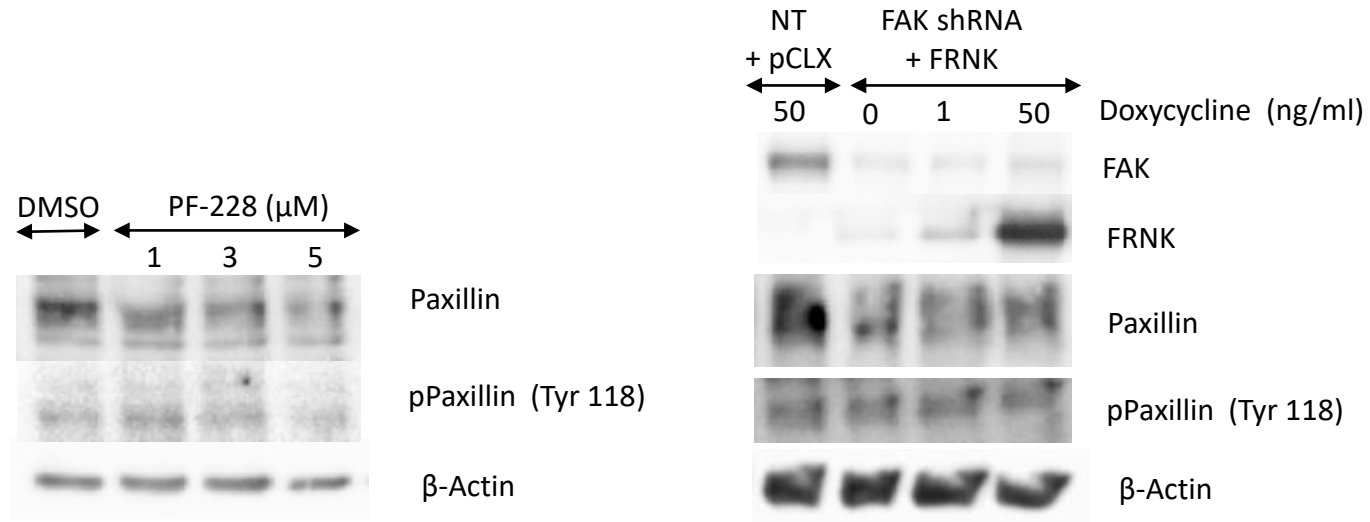

B

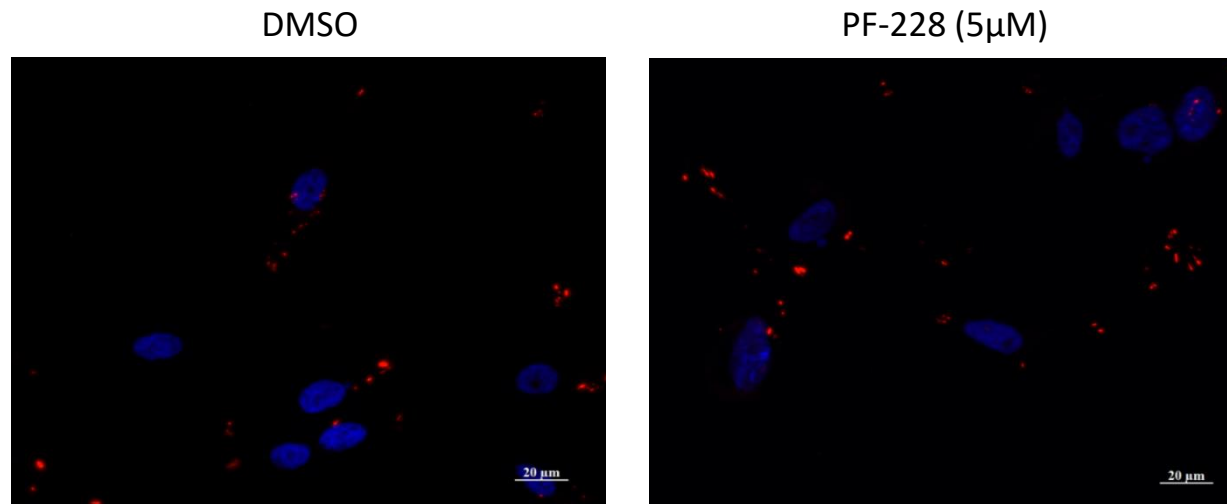

- pPaxillin (Tyr 118) = Alexa555
- Nucleus = DAPI

**Supplementary Figure S4: phospho-Paxillin expression in NCI-H446 SCLC cell line where FAK has been inhibited with pharmacological and genetic methods:**

**A. Phospho-Paxillin expression evaluation by WB.** FAK was inhibited in NCI-H446 cell lines with PF-228 for 90 min. or a genetic method. In this last one, cell lines were first stably transduced with FAK shRNA or no-target (NT) shRNA and then stably transduced with doxycycline-inducible FRNK-expression plasmid or pCLX empty vector as control. After transduction, they were submitted to puromycin and blasticidin-selection for two weeks. Finally, they were treated with doxycycline for 48h before the experiments. Whole cell lysates from SCLC cell lines were resolved with SDS-PAGE and blots were incubated with antibodies against total FAK (125 kD), FRNK (41 kD), total Paxillin (68 kD), phospho-Paxillin (68 kD), and  $\beta$ -Actin (45 kD) for normalization. FAK inhibition, either with PF-228 or double-transduction with FAK shRNA and FRNK, did not modify phospho-Paxillin (Tyr118) expression.

## **B. Phospho-Paxillin expression evaluation by immunofluorescence (IF).**

NCI-H446 cell lines treated with PF-228 5 $\mu$ M or DMSO were formal-fixed, stained with an antibody against phospho-Paxillin (Tyr-118) (1/1000, rabbit polyclonal; Cell Signaling Technology), followed by an anti-rabbit polyHRP secondary antibody, and revealed with tyramide Alexa555 (red). Nuclei were stained with DAPI (blue). FAK inhibition with PF-228 did not modify phospho-Paxillin (Tyr118) expression.

## **Supplementary Video1: PF-228's effect on NCI-446 SCLC cell line migration.**

NCI-H446 cell lines were grown to confluence in 12-well plates. Cell monolayers were wounded using a micropipette tip and floating cells were washed off with PBS. After overnight incubation, PF-228 at a concentration of 3 $\mu$ M or DMSO was added to culture medium. Cell movements within wounded area were monitored for 12h starting from the time drug was added using a Zeiss Axiovert 200M microscope (Zeiss, Thornwood, NY) at x200 magnification. Images were captured every 15-minutes from five different fields randomly selected in each well. They show that PF-228 decreased migration velocity in NCI-H446 cell lines.
